# Supplementary material for: A Critical Cross-Species Comparison of Pollen from Nelumbo nucifera Gaertn. vs. Nymphaea lotus L. for Authentication of Thai Medicinal Herbal Tea
Source: PubMed Central journal article supplement (PMC7412456; doi:10.3390/plants9070921), 2020-07-21
Supplement: plants-09-00921-s001.pdf [file plants-09-00921-s001.pdf]

**Table S1.** Relative quantification (expressed in absorbance unit per g dry weight (DW)) of the different flavonoid glucosides in the *N. lotus* and *N. nucifera* stamen extracts.

| <b>Compound</b> | <i>N. lotus</i> | <i>N. nucifera</i> |
|-----------------|-----------------|--------------------|
| Myr 3-O-Gal     | 76.9 ± 3.8      | -                  |
| Myr 3'-O-Xyl    | 129.3 ± 6.7     | -                  |
| Que-3-O-Rha     | 244.2 ± 5.1     | -                  |
| CNar-2''-O-Gal  | 64.7 ± 3.6      | -                  |
| Kae-3-O-Gal     | 200.2 ± 5.4     | -                  |
| Que-3'-O-Xyl    | 117.2 ± 2.4     | -                  |
| Iso-7-O-Gal     | 90.4 ± 3.3      | -                  |
| Iso-7-O-Xyl     | 144.2 ± 5.7     | -                  |
| Iso-3-O-Xyl     | 56.6 ± 1.7      | -                  |
| <b> </b>        |                 |                    |
| Myr-3-O-Glc     | -               | 204.3 ± 10.0       |
| Quer-3-O-Rut    | -               | 13.5 ± 2.8         |
| Quer-3-O-GlcA   | -               | 55.2 ± 3.3         |
| Kae-3-O-Rob     | -               | 243.2 ± 11.5       |
| Kae-3-O-Glc     | -               | 325.8 ± 16.7       |
| Kae-3-O-GlcA    | -               | 564.7 ± 18.8       |
| Iso-3-O-Glc     | -               | 157.2 ± 10.7       |
